# Supplementary material for: BDNF/TRKB axis provokes EMT progression to induce cell aggressiveness via crosstalk with cancer-associated fibroblasts in human parotid gland cancer
Source: PubMed Central journal article supplement (PMC9584965; doi:10.1038/s41598-022-22377-9), 2022-10-20

## Supplemental Data

### **BDNF/TRKB axis provokes EMT progression to induce cell aggressiveness via crosstalk with cancer-associated fibroblasts in human parotid gland cancer**

Kazumasa Moriwaki<sup>1,\*,+</sup>, Masaki Wada<sup>2,+</sup>, Hiroko Kuwabara<sup>3</sup>, Yusuke Ayani<sup>2</sup>, Tetsuya Terada<sup>2</sup>, Masaaki Higashino<sup>2</sup>, Ryo Kawata<sup>2</sup>, and Michio Asahi<sup>1,\*</sup>

<sup>1</sup>Department of Pharmacology, Faculty of Medicine, Osaka Medical and Pharmaceutical University, 2-7, Daigaku-machi, Takatsuki, Osaka 569-8686, Japan

<sup>2</sup>Department of Otolaryngology-Head and Neck Surgery, Faculty of Medicine, Osaka Medical and Pharmaceutical University, 2-7, Daigaku-machi, Takatsuki, Osaka 569-8686, Japan

<sup>3</sup>Department of Pathology, Faculty of Medicine, Osaka Medical and Pharmaceutical University, 2-7, Daigaku-machi, Takatsuki, Osaka 569-8686, Japan

\*Authors for correspondence: E-MAIL [masahi@ompu.ac.jp](mailto:masahi@ompu.ac.jp) or [kazumasa.moriwaki@ompu.ac.jp](mailto:kazumasa.moriwaki@ompu.ac.jp); Phone 81-72-684-7292; FAX 81-72-684-6518

<sup>+</sup>These authors contributed equally to this work.

## Supplementary Figure S1

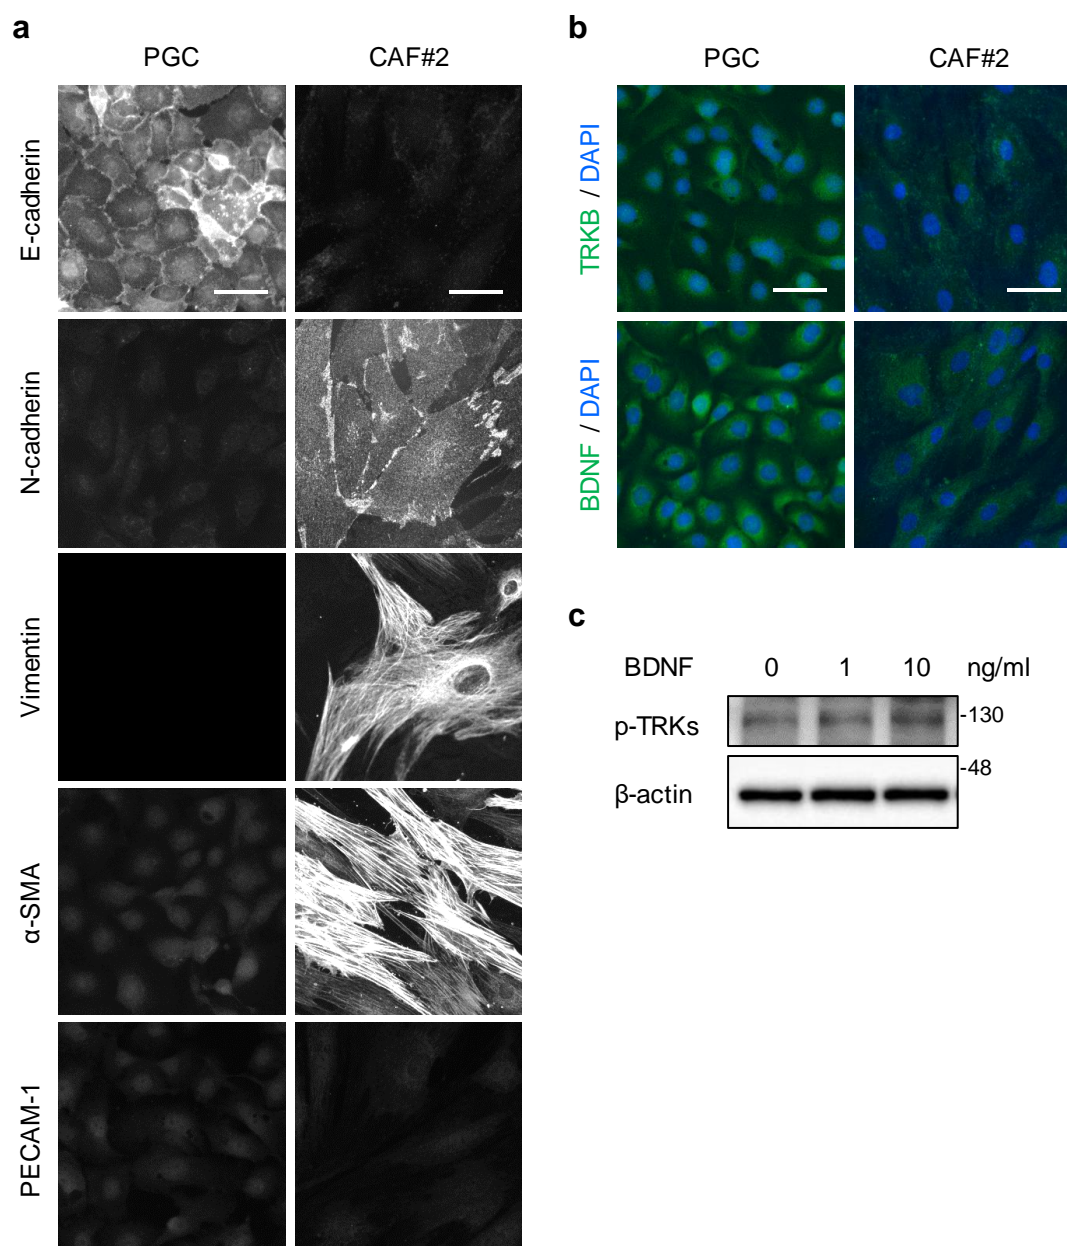**Supplementary Figure S1. Establishment of PGC cells and CAFs from patients with PGC.**

**a.** Characterization of established PGC cells and CAFs by immunofluorescence using the indicated antibodies. Scale bars, 50  $\mu$ m. **b.** Expression of TRKB and BDNF in PGC cells and CAFs was detected by immunofluorescence analysis. Scale bars, 50  $\mu$ m. **c.** BDNF-dependent phosphorylation of TRKB in PGC cells was determined by WB analysis using anti-phospho-TRK antibody (1:1000; #4619, Cell Signaling Technology). After 24 h of serum-starvation (0.5% FBS), PGC cells were stimulated with BDNF (0, 1, and 10 ng/ml) for 30 min.

**Supplementary Figure S2**

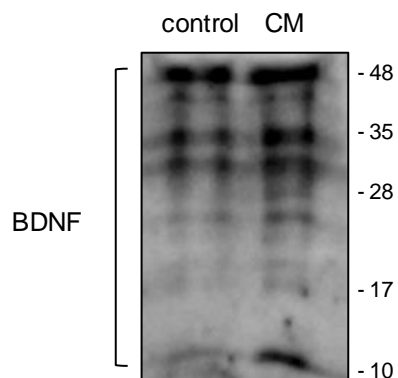

**Supplementary Figure S2. BDNF production in conditioned medium.**

BDNF in CM from PGC/CAF co-culture was determined by WB analysis using anti-BDNF antibody. Basal medium (RPMI1640 with 10% FBS) cultured for 4 days in a cell culture incubator was used as control.

## Supplementary Figure S3

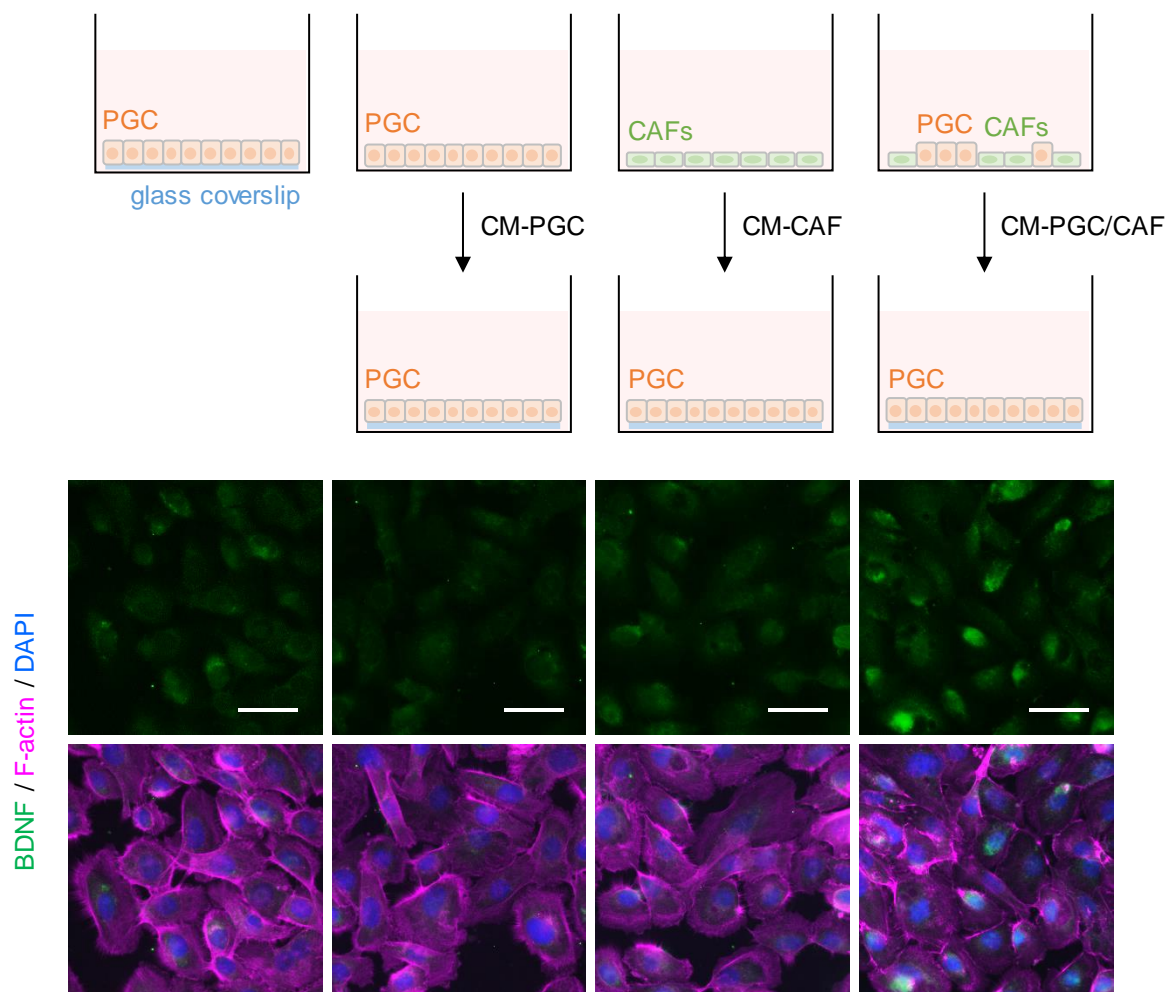

**Supplementary Figure S3. Upregulation of BDNF in PGC cells directly or indirectly co-cultured with CAFs.** BDNF expression in PGC cells was determined by immunofluorescence analysis. PGC cells were cultured for 4 days under the conditions described in the scheme. Scale bars, 50 μm. CM-PGC, cell-free conditioned medium from PGC cultures; CM-CAF, cell-free conditioned medium from CAF cultures; CM-PGC/CAF, cell-free conditioned medium from PGC/CAF co-cultures.

## Supplementary Figure S4

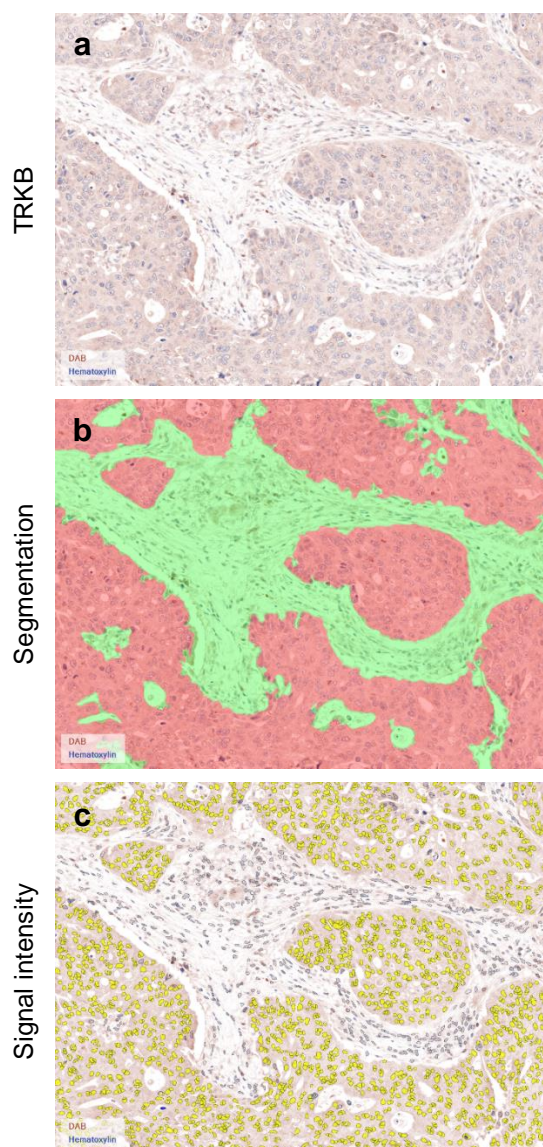**Supplementary Figure S4. Imaging analysis of immunohistochemistry by inForm software.**

**a.** Representative image of TRKB-staining tissue acquired using Vectra Polaris automated quantitative pathology imaging system. **b-c.** Tissue segmentation into carcinoma (red) and stromal areas (green) and the staining positivity (blue, negative; yellow, positive) were shown in (b) and (c), respectively.

Supplementary Figure S5

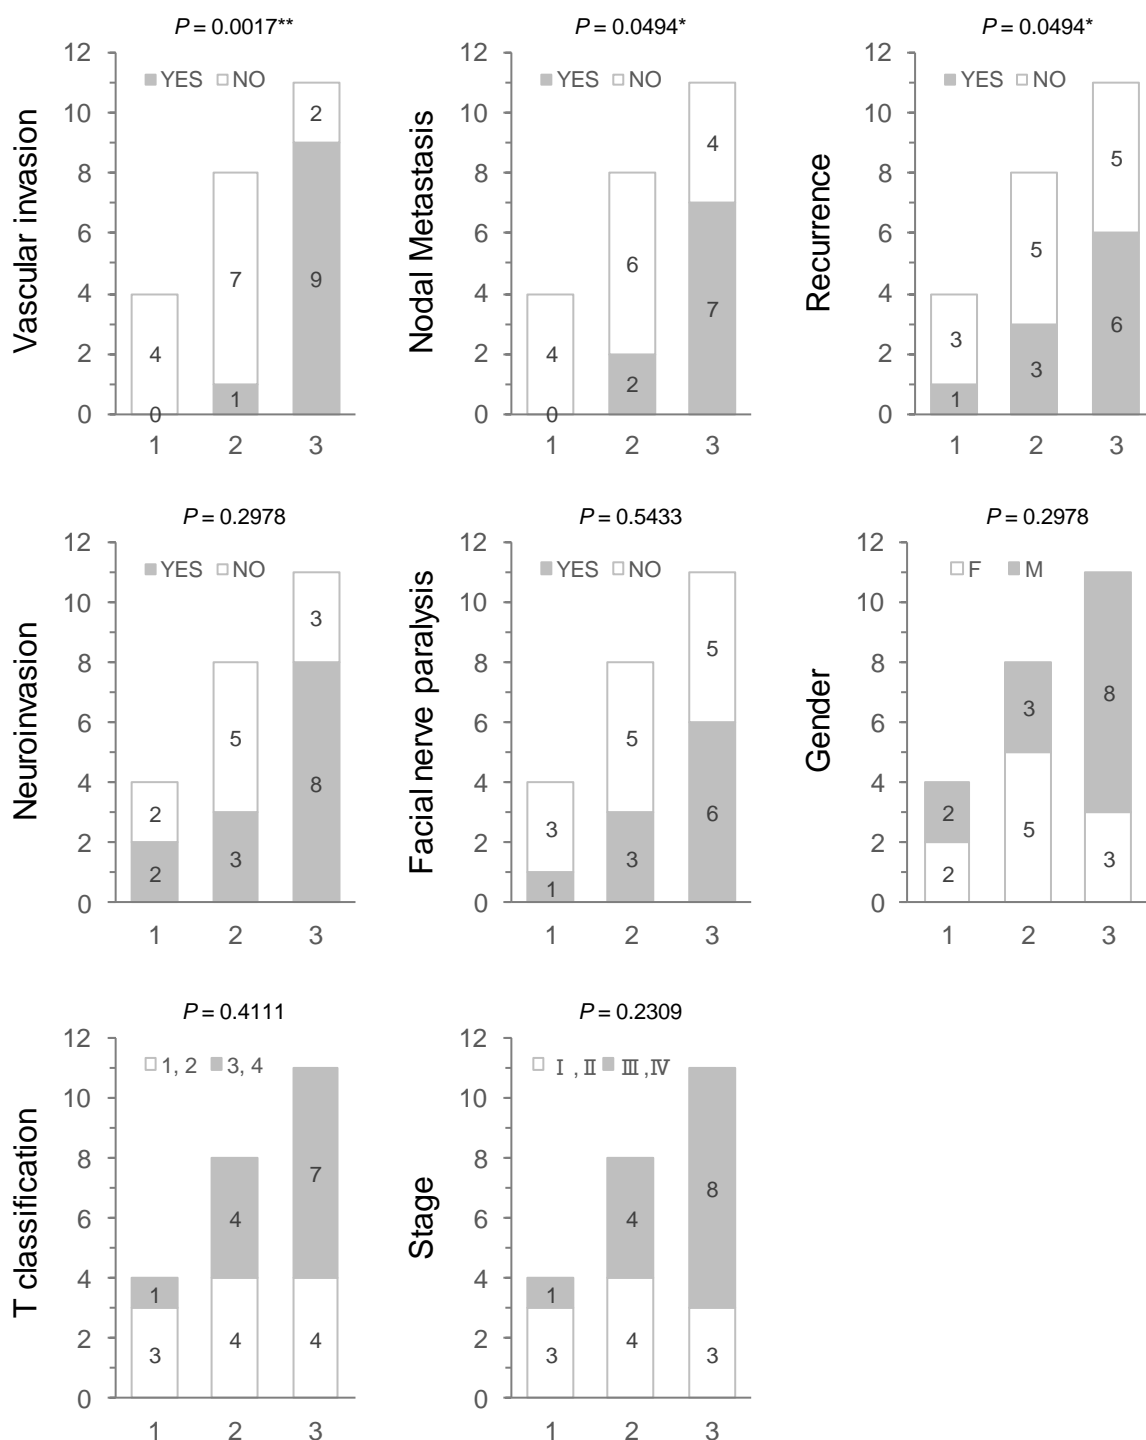

Supplementary Figure S5. Correlation between TRKB expression and clinical significance of patients with PGC (n = 23).

Histograms show the correlation between the TRKB-staining intensity which was classified into three levels (level 1 < 2 < 3, see Fig. 5b) and the clinical variables. Note, the number of patients with the poorest prognostic markers increased in a stepwise manner depending on TRKB expression levels. F, female; M, male. Statistical analyses were performed using Pearson's  $\chi^2$  test or Fisher's exact test. \* $P < 0.05$ ; \*\* $P < 0.01$ .

**Supplementary Figure S6. Original images of Western blot.**

Original images of Western blot or PVDF membrane in all experiments are shown below.

Fig. 2b. E-cadherin  
Vimentin

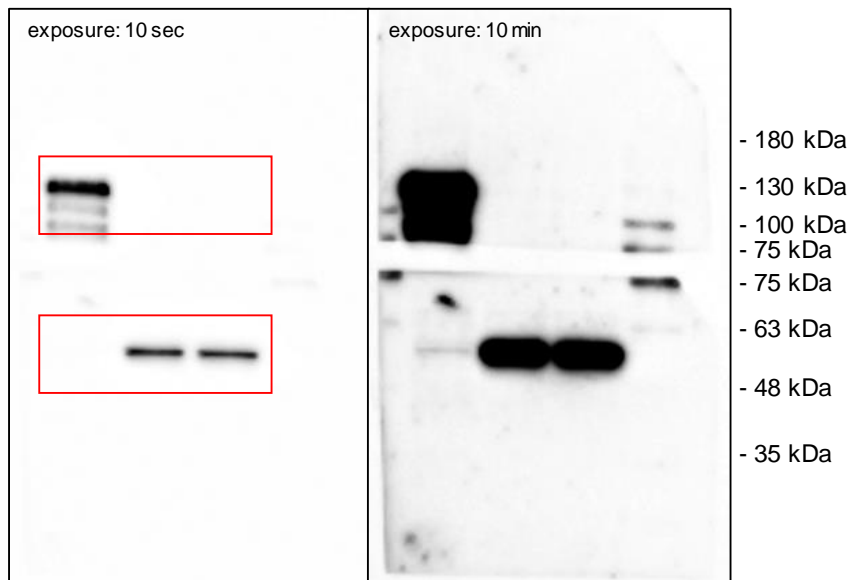

Fig. 2b.  $\alpha$ -SMA

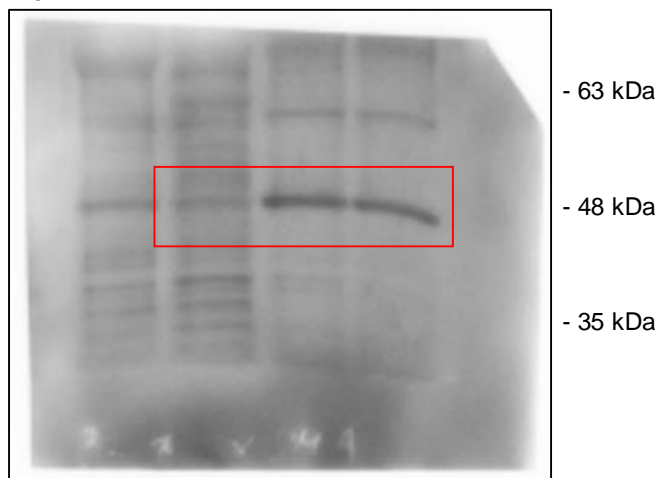

Fig. 2b. VE-cad

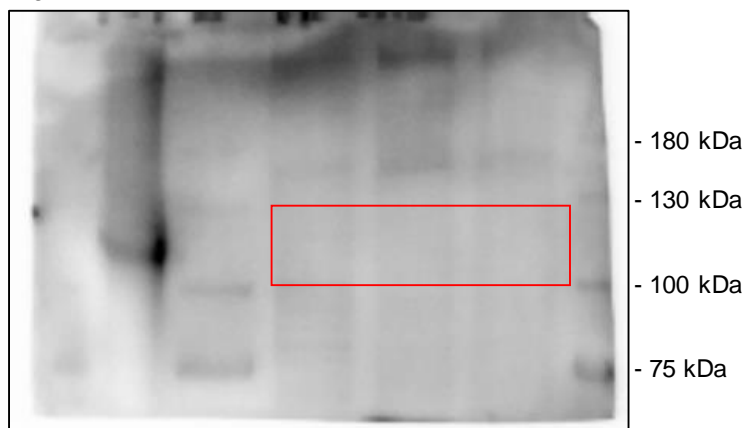

Fig. 2b. TRKB

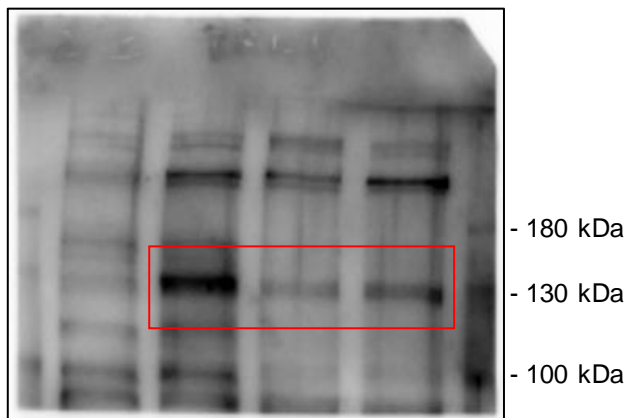

Fig. 2b. BDNF

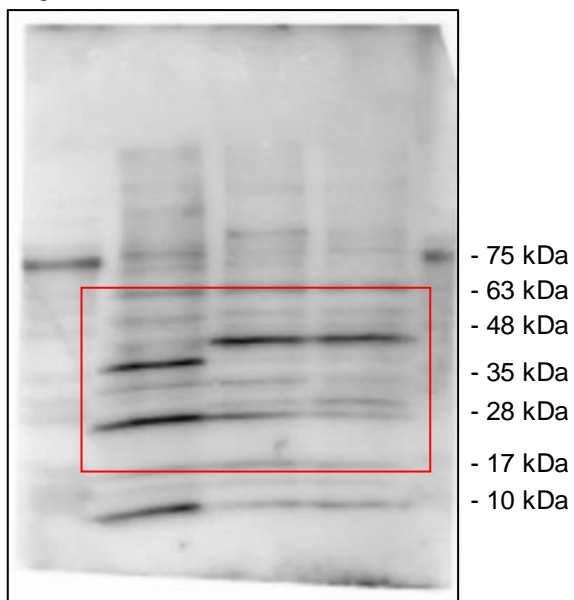

Fig. 2b.  $\beta$ -actin

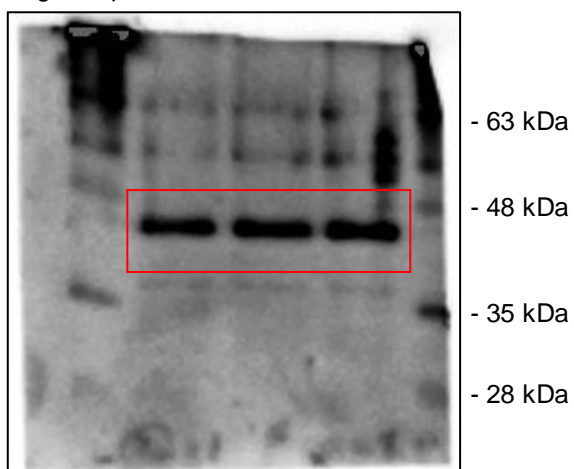



Fig. 2f. Snail

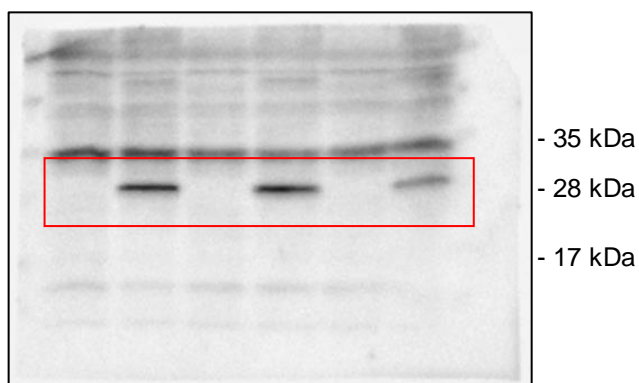

Fig. 2f. E-cadherin

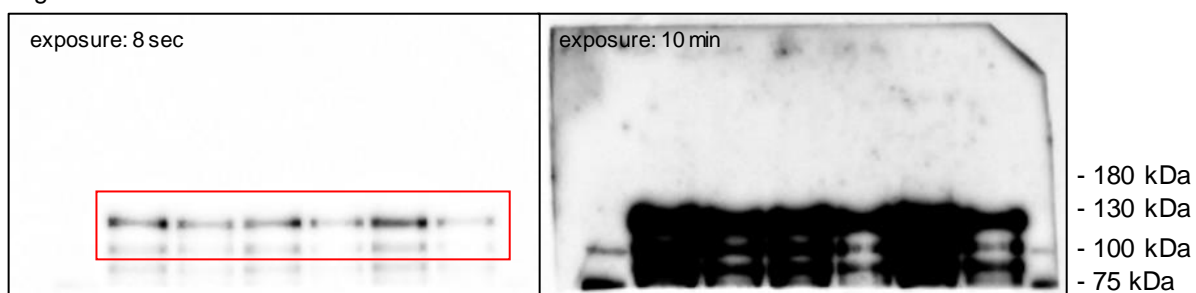

Fig. 2f. BDNF

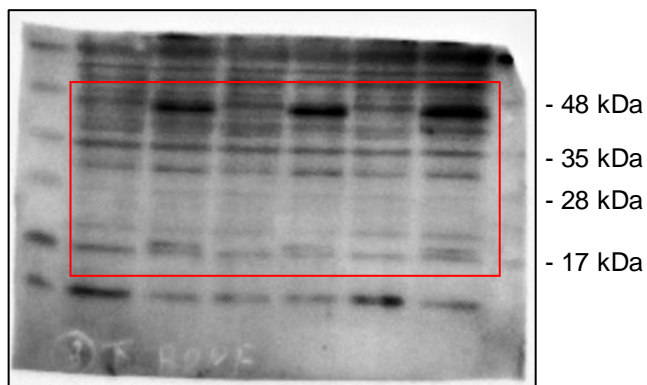

Fig. 2f.  $\beta$ -actin

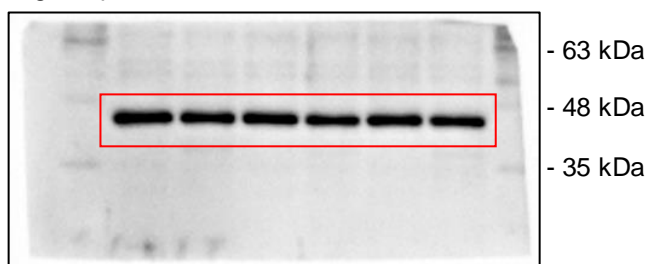

Fig. 2g. p-TRK

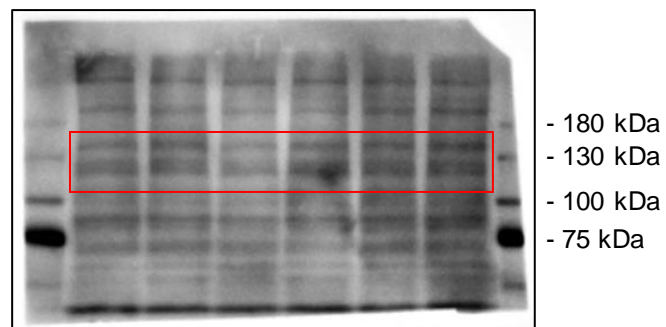

Fig. 2g. p-Akt

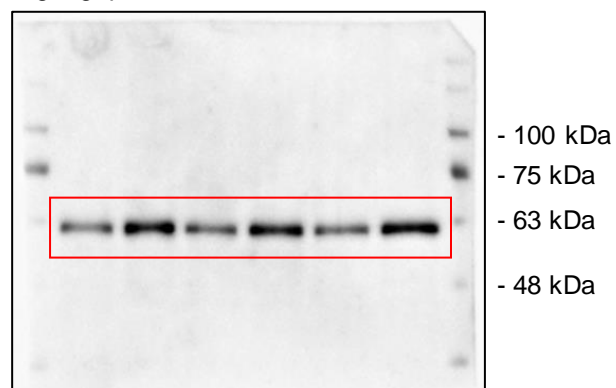

Fig. 2g. p-Erk1/2

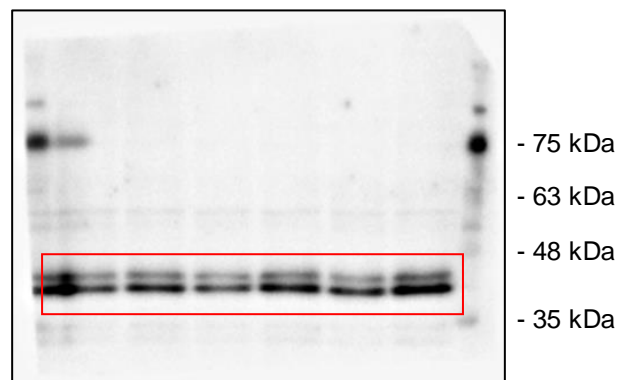

Fig. 2g.  $\beta$ -actin

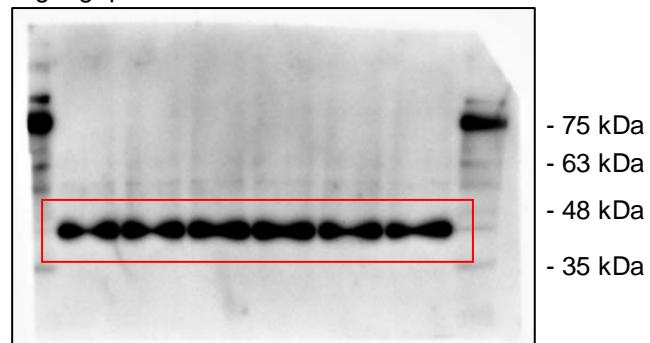

Fig. 3b. Snail

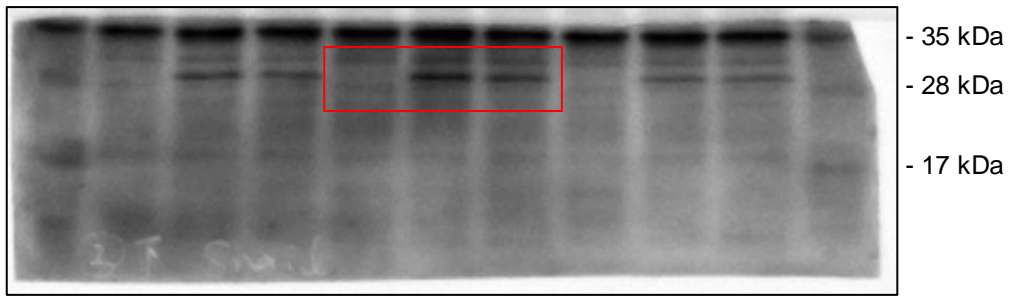

Fig. 3b. E-cadherin  
 $\beta$ -actin

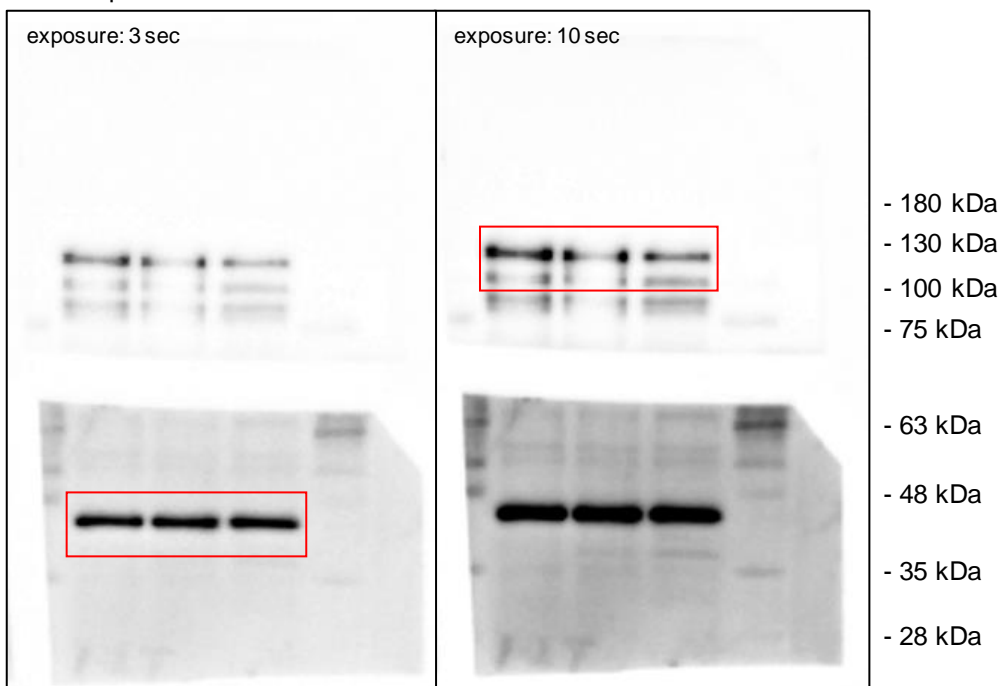

Fig. 4b. p-TRKs

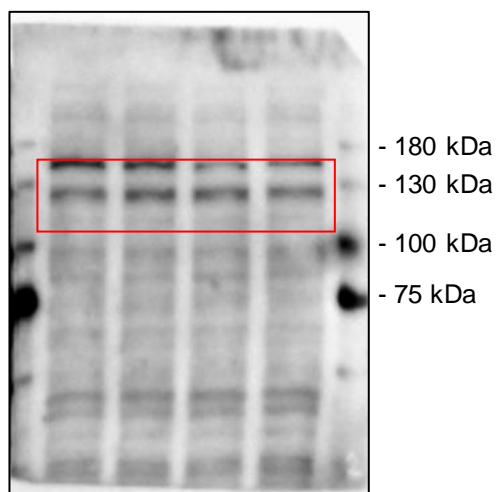

Fig. 4b.  $\beta$ -actin

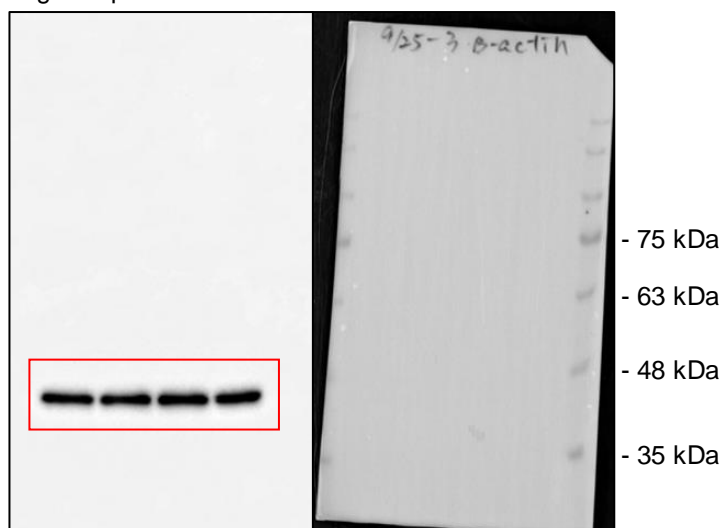

Fig. S1c. p-TRKs

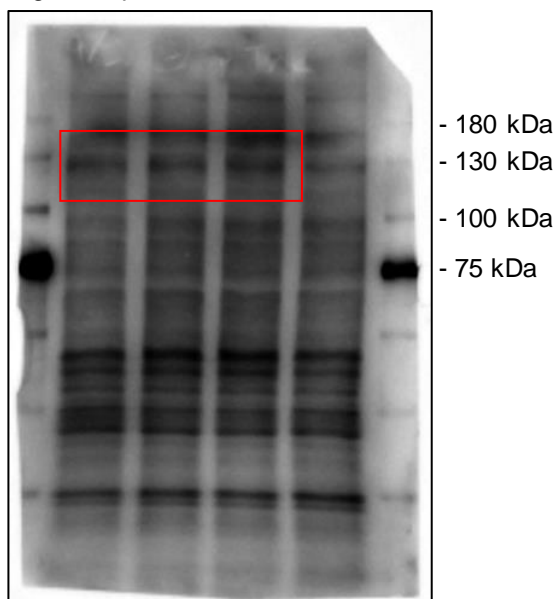

Fig. S1c.  $\beta$ -actin

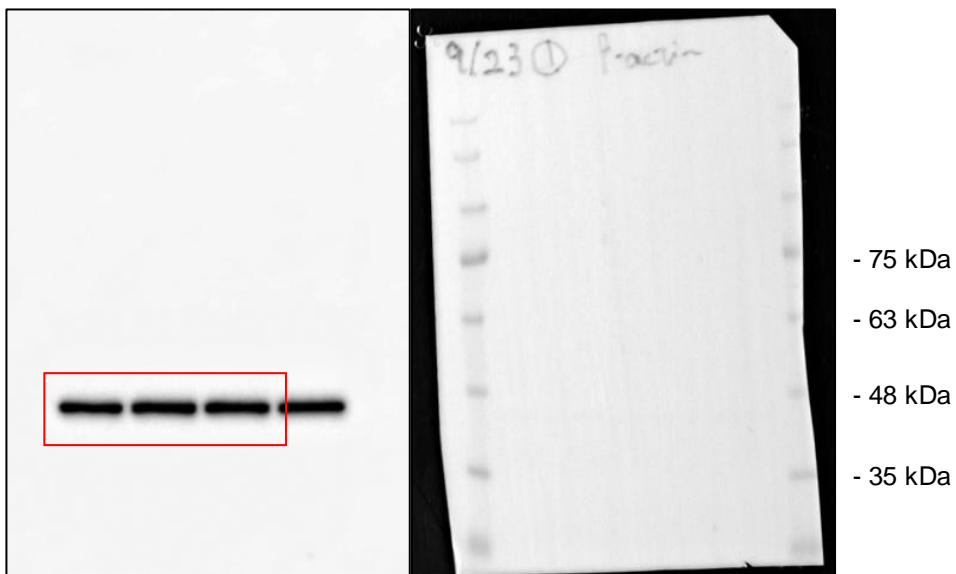

Fig. S2. BDNF

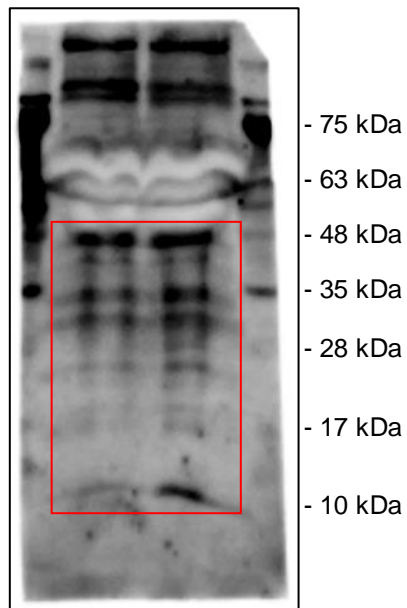

Supplement: 41598_2022_22377_MOESM1_ESM.pdf [file 41598_2022_22377_MOESM1_ESM.pdf]
